# Supplementary material for: What Are the Key Anatomical Features for the Success of Nose-to-Brain Delivery? A Study of Powder Deposition in 3D-Printed Nasal Casts
Source: MDPI journal article supplement (doi:10.3390/pharmaceutics15122661), 2023-11-23
Supplement: s1 [file s1]

## S1: Details of the statistical method

Multivariate statistics is an ensemble of methods seeking to describe datasets whose outputs are constituted by more than one variable. In our case, the output variable is the overall deposition in the cast and the influence of each parameter. These variables are described by the coefficients of the statistical models extracted from the experiments. The goal of multivariate statistics is to group the variables that are linked by a shared relationship.

The most frequent of those statistics techniques is the principal component analysis (PCA). The principle of this method is to explain as much variability as reasonably achievable by using the least possible amount of variables. For that, the initial output variables are combined by linear transformation into a new set of output variables, the so-called principal components. The advantage of these new variables is that a given variable explains more variability than the following one. Consequently, it is possible to explain most of the variance (usually more than 70%) using a limited number of variables (usually 2 or 3) instead of the initial set.

The number of components to retain in the final analysis can be determined by multiple methods. The easiest one is setting the minimal variance explained by the  $x$  first components. Another technique is to use a scree plot, i.e. the representation of the variance explained by each component and looking for the elbow in the graph. Indeed, the elbow means that the benefit of adding a new component in term of explanation is lower than the cost of increased complexity. Once the components that should be kept are known, the individuals can be represented in 2D spaces, called factorial planes, using two principal components as axes instead of the initial set of variables. Since the method aims to explain the maximal amount of variance by the first components, the points in the factorial planes are as spread as possible.

Another method, similar to principal component analysis, is exploratory factor analysis (EFA). They both use a similar approach of linear transformation to group a large number of variables into a smaller set of outputs based on the similarities between them. The difference between the two methods comes from the assumption made in EFA that there exists one or more latent variables that are not directly observed but that explain the results. The goal is thus to group the observed variables by the latent variables underlying them instead of explaining the most variance possible.

After this initial dimensionality-reduction step, other techniques can be applied to cluster the individuals in a certain number of groups sharing common characteristics. The two most used clustering methods are hierarchical clustering and centroid-based clustering, also called k-means clustering. Both techniques rely on the relative positions of the individuals in the space, either the observed output space or the transformed factorial plane.

Hierarchical clustering begins by grouping the two closest individuals and representing the resulting cluster by the median position of the initial points. The process is then reiterated by grouping the next-closest points, including those created by aggregation, until all the individuals are linked together in a single cluster.

The initial step of k-means clustering is determining the final number of clusters. This number can be determined by a priori knowledge, observation of the dataset or other techniques, such as using a previous hierarchical clustering, that does not need the number of clusters to be determined initially. The seeds, i.e. the initial center of the groups, are then placed in the space, either randomly or deterministically, and each individual is assigned to the cluster whose center is the closest. Once all individuals have been linked to a group, the

centers of these clusters are computed and serve as seeds for the next iteration. These steps are repeated until two subsequent iterations give the same classification.

## S2: Coronal slices of the anatomies

Coronal slice of each anatomy used in the study. Note that C1 is slice of the STL file and C2 has been artificially created from C5 by filling the septum perforation.

|                                                                                     |                                                                                     |                                                                                       |
|-------------------------------------------------------------------------------------|-------------------------------------------------------------------------------------|---------------------------------------------------------------------------------------|
| 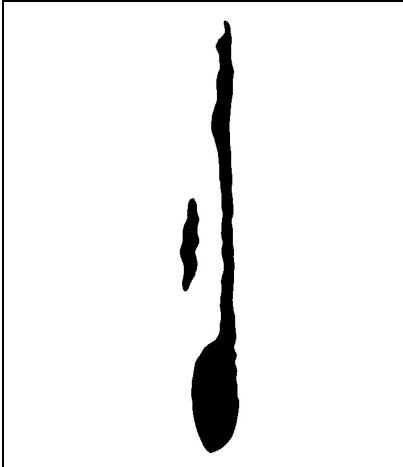   |    |    |
| C1 – Standard                                                                       | C2 – Normal                                                                         | C3 – Normal                                                                           |
|   |   |   |
| C4 – Normal                                                                         | C5 – Perforation                                                                    | C6 – Pediatric                                                                        |
|  |  |  |
| C7 – Pediatric                                                                      | C8 – Septum deviation                                                               | C9 – Septum deviation                                                                 |

|                                                                                   |                                                                                   |  |
|-----------------------------------------------------------------------------------|-----------------------------------------------------------------------------------|--|
|  |  |  |
| C10 – Turbinate hypertrophy                                                       | C11 – Turbinate hypertrophy                                                       |  |

### S3: Raw experimental results

| C1  | Factor 1 | Factor 2  | Factor 3                 | Response 1 | Response 2       | Response 3       | Response 4       | Response 5   | Response 6          |
|-----|----------|-----------|--------------------------|------------|------------------|------------------|------------------|--------------|---------------------|
| Run | Device   | Angle (°) | Inspiratory flow (L/min) | Nostril    | Olfactory region | Middle turbinate | Lower turbinates | Naso-pharynx | Post-nasal fraction |
|     |          |           |                          | %          | %                | %                | %                | %            | %                   |
| 1   | Trivair  | Center    | 0                        | 18.6       | 1.2              | 30.0             | 38.2             | 8.8          | 3.1                 |
| 2   | Trivair  | Center    | 0                        | 20.9       | 3.3              | 33.5             | 35.0             | 5.5          | 1.8                 |
| 3   | Trivair  | Direct    | 0                        | 30.9       | 5.5              | 37.7             | 22.3             | 2.3          | 1.2                 |
| 4   | MIAT     | Center    | 60                       | 5.2        | 5.8              | 35.8             | 24.6             | 15.1         | 13.6                |
| 5   | MIAT     | Direct    | 0                        | 29.6       | 6.1              | 28.9             | 28.8             | 3.6          | 3.0                 |
| 6   | MIAT     | Direct    | 60                       | 11.8       | 6.8              | 32.6             | 22.6             | 13.6         | 12.6                |
| 7   | MIAT     | Direct    | 15                       | 11.4       | 8.2              | 32.0             | 20.6             | 15.3         | 12.6                |
| 8   | MIAT     | Center    | 0                        | 9.7        | 9.1              | 43.4             | 17.0             | 15.5         | 5.2                 |
| 9   | MIAT     | Direct    | 0                        | 29.2       | 9.2              | 24.7             | 30.2             | 5.1          | 1.7                 |
| 10  | MIAT     | Center    | 15                       | 5.5        | 9.6              | 34.2             | 23.1             | 18.0         | 9.6                 |
| 11  | UDS      | Center    | 60                       | 6.9        | 10.5             | 36.0             | 24.5             | 15.5         | 6.6                 |
| 12  | MIAT     | Center    | 15                       | 10.0       | 12.0             | 30.2             | 21.8             | 15.8         | 10.2                |
| 13  | MIAT     | Center    | 0                        | 18.2       | 14.6             | 32.3             | 26.9             | 5.1          | 3.0                 |
| 14  | UDS      | Center    | 60                       | 5.0        | 22.7             | 38.4             | 15.3             | 13.6         | 5.0                 |
| 15  | UDS      | Direct    | 0                        | 13.1       | 27.2             | 35.3             | 21.4             | 2.8          | 0.2                 |
| 16  | UDS      | Center    | 15                       | 7.1        | 29.5             | 27.4             | 16.8             | 15.3         | 3.9                 |
| 17  | UDS      | Direct    | 0                        | 14.0       | 31.2             | 38.3             | 13.8             | 2.5          | 0.2                 |
| 18  | UDS      | Center    | 0                        | 10.0       | 35.5             | 40.5             | 12.7             | 1.3          | 0.0                 |

| C2  | Factor 1 | Factor 2  | Factor 3                 | Factor 4 | Response 1 | Response 2       | Response 3       | Response 4       | Response 5   | Response 6          |
|-----|----------|-----------|--------------------------|----------|------------|------------------|------------------|------------------|--------------|---------------------|
| Run | Device   | Angle (°) | Inspiratory flow (L/min) | Side     | Nostril    | Olfactory region | Middle turbinate | Lower turbinates | Naso-pharynx | Post-nasal fraction |
|     |          |           |                          |          | %          | %                | %                | %                | %            | %                   |
| 1   | MIAT     | Center    | 60                       | Right    | 2.5        | 0.8              | 27.2             | 18.0             | 42.4         | 9.0                 |
| 2   | Trivair  | Direct    | 0                        | Right    | 7.8        | 1.1              | 50.1             | 39.6             | 0.8          | 0.5                 |
| 3   | UDS      | Center    | 15                       | Left     | 11.0       | 3.6              | 63.2             | 19.7             | 1.5          | 0.9                 |
| 4   | MIAT     | Direct    | 60                       | Right    | 7.9        | 5.4              | 64.9             | 3.4              | 14.2         | 4.2                 |
| 5   | UDS      | Center    | 60                       | Left     | 16.9       | 5.9              | 62.0             | 7.7              | 7.1          | 0.3                 |
| 6   | Trivair  | Center    | 0                        | Left     | 7.0        | 6.7              | 50.3             | 18.4             | 16.2         | 1.4                 |
| 7   | MIAT     | Direct    | 15                       | Left     | 6.8        | 7.1              | 65.7             | 11.5             | 6.8          | 2.1                 |
| 8   | MIAT     | Center    | 60                       | Left     | 6.5        | 7.8              | 71.3             | 11.1             | 2.6          | 0.8                 |
| 9   | Trivair  | Direct    | 0                        | Right    | 7.2        | 8.1              | 52.9             | 15.3             | 8.7          | 7.8                 |
| 10  | UDS      | Center    | 0                        | Left     | 9.3        | 8.1              | 61.1             | 20.1             | 0.7          | 0.6                 |
| 11  | Trivair  | Direct    | 0                        | Right    | 7.4        | 8.2              | 57.0             | 27.2             | 0.2          | 0.1                 |
| 12  | Trivair  | Direct    | 0                        | Left     | 22.0       | 9.8              | 64.5             | 3.4              | 0.1          | 0.1                 |
| 13  | UDS      | Center    | 0                        | Right    | 6.2        | 12.8             | 70.2             | 8.5              | 0.4          | 1.8                 |
| 14  | MIAT     | Direct    | 60                       | Left     | 27.6       | 14.3             | 36.3             | 14.0             | 6.4          | 1.3                 |
| 15  | MIAT     | Center    | 0                        | Right    | 7.2        | 16.2             | 49.2             | 17.0             | 7.4          | 3.0                 |
| 16  | MIAT     | Center    | 0                        | Left     | 6.9        | 16.6             | 55.8             | 14.7             | 8.1          | 0.7                 |
| 17  | MIAT     | Center    | 0                        | Left     | 6.9        | 16.6             | 55.8             | 14.7             | 8.1          | 0.7                 |
| 18  | UDS      | Direct    | 15                       | Right    | 1.7        | 19.6             | 59.5             | 9.1              | 8.3          | 1.7                 |
| 19  | UDS      | Direct    | 60                       | Left     | 8.7        | 22.9             | 64.2             | 1.0              | 2.9          | 0.3                 |
| 20  | UDS      | Direct    | 60                       | Right    | 2.7        | 23.7             | 57.4             | 7.3              | 8.6          | 0.3                 |
| 21  | UDS      | Direct    | 15                       | Left     | 11.5       | 27.7             | 56.0             | 3.5              | 0.5          | 0.7                 |
| 22  | MIAT     | Center    | 15                       | Right    | 5.2        | 28.0             | 20.7             | 24.7             | 13.2         | 8.2                 |
| 23  | UDS      | Direct    | 60                       | Right    | 2.8        | 32.6             | 54.6             | 3.6              | 5.9          | 0.4                 |
| 24  | MIAT     | Direct    | 0                        | Right    | 10.2       | 33.6             | 31.9             | 8.0              | 8.5          | 7.7                 |
| 25  | UDS      | Direct    | 0                        | Right    | 1.9        | 38.6             | 53.5             | 4.5              | 1.0          | 0.5                 |
| 26  | UDS      | Direct    | 0                        | Right    | 1.9        | 38.6             | 53.5             | 4.5              | 1.0          | 0.5                 |
| 27  | UDS      | Direct    | 15                       | Left     | 8.0        | 40.4             | 46.1             | 2.0              | 2.0          | 1.5                 |

| C3  | Factor 1 | Factor 2  | Factor 3                 | Factor 4 | Response 1 | Response 2       | Response 3       | Response 4       | Response 5   | Response 6          |
|-----|----------|-----------|--------------------------|----------|------------|------------------|------------------|------------------|--------------|---------------------|
| Run | Device   | Angle (°) | Inspiratory flow (L/min) | Side     | Nostril    | Olfactory region | Middle turbinate | Lower turbinates | Naso-pharynx | Post-nasal fraction |
|     |          |           |                          |          | %          | %                | %                | %                | %            | %                   |
| 1   | TriVair  | Direct    | 0                        | Right    | 67.2       | 1.7              | 22.2             | 5.1              | 1.8          | 2.0                 |
| 2   | TriVair  | Direct    | 0                        | Left     | 49.4       | 2.1              | 28.4             | 13.5             | 5.3          | 1.2                 |
| 3   | UDS      | Direct    | 15                       | Left     | 58.7       | 2.2              | 14.9             | 14.8             | 5.9          | 3.4                 |
| 4   | TriVair  | Center    | 0                        | Left     | 71.3       | 3.0              | 13.9             | 10.1             | 0.9          | 0.9                 |
| 5   | MIAT     | Direct    | 60                       | Left     | 63.9       | 3.7              | 29.0             | 1.4              | 0.6          | 1.3                 |
| 6   | MIAT     | Center    | 15                       | Left     | 60.6       | 4.2              | 14.8             | 13.6             | 2.7          | 4.0                 |
| 7   | TriVair  | Direct    | 0                        | Left     | 55.3       | 4.3              | 25.0             | 9.3              | 4.6          | 1.6                 |
| 8   | MIAT     | Direct    | 15                       | Left     | 55.7       | 4.8              | 23.6             | 9.8              | 2.9          | 3.1                 |
| 9   | TriVair  | Direct    | 0                        | Right    | 39.0       | 5.3              | 48.4             | 3.4              | 2.5          | 1.4                 |
| 10  | MIAT     | Direct    | 15                       | Right    | 41.9       | 6.0              | 36.9             | 8.9              | 5.1          | 1.7                 |
| 11  | UDS      | Direct    | 60                       | Right    | 26.8       | 10.1             | 47.0             | 4.5              | 11.0         | 0.5                 |
| 12  | UDS      | Center    | 0                        | Left     | 46.0       | 10.2             | 33.1             | 9.5              | 0.7          | 0.5                 |
| 13  | UDS      | Center    | 0                        | Left     | 47.7       | 11.5             | 32.6             | 7.6              | 0.6          | 0.2                 |
| 14  | MIAT     | Center    | 60                       | Left     | 33.0       | 13.3             | 32.3             | 15.9             | 3.7          | 1.8                 |
| 15  | MIAT     | Center    | 0                        | Right    | 45.8       | 15.4             | 33.3             | 3.8              | 1.2          | 0.5                 |
| 16  | UDS      | Center    | 60                       | Left     | 38.6       | 16.4             | 35.9             | 4.8              | 3.5          | 0.7                 |
| 17  | TriVair  | Center    | 0                        | Right    | 56.3       | 20.4             | 20.3             | 1.4              | 0.9          | 0.7                 |
| 18  | UDS      | Center    | 0                        | Right    | 36.6       | 41.6             | 20.8             | 0.5              | 0.4          | 0.1                 |
| 19  | UDS      | Center    | 15                       | Right    | 35.3       | 43.7             | 19.0             | 0.4              | 1.0          | 0.5                 |

| C5  | Factor 1 | Factor 2  | Factor 3                 | Factor 4 | Response 1 | Response 2       | Response 3       | Response 4       | Response 5   | Response 6          |
|-----|----------|-----------|--------------------------|----------|------------|------------------|------------------|------------------|--------------|---------------------|
| Run | Device   | Angle (°) | Inspiratory flow (L/min) | Side     | Nostril    | Olfactory region | Middle turbinate | Lower turbinates | Naso-pharynx | Post-nasal fraction |
|     |          |           |                          |          | %          | %                | %                | %                | %            | %                   |
| 1   | Trivair  | Center    | 0                        | Left     | 12.9       | 0.3              | 16.1             | 70.4             | 0.1          | 0.1                 |
| 2   | UDS      | Center    | 15                       | Left     | 11.2       | 0.4              | 80.3             | 6.9              | 0.6          | 0.6                 |
| 3   | MIAT     | Center    | 15                       | Left     | 1.0        | 0.5              | 62.3             | 20.2             | 10.7         | 5.2                 |
| 4   | UDS      | Direct    | 15                       | Left     | 19.4       | 0.6              | 74.4             | 4.3              | 0.7          | 0.7                 |
| 5   | UDS      | Direct    | 15                       | Right    | 19.4       | 0.6              | 74.4             | 4.3              | 0.7          | 0.7                 |
| 6   | MIAT     | Direct    | 15                       | Left     | 6.9        | 1.0              | 75.4             | 12.4             | 2.7          | 1.6                 |
| 7   | Trivair  | Center    | 0                        | Right    | 7.0        | 2.2              | 39.9             | 49.5             | 1.3          | 0.1                 |
| 8   | UDS      | Center    | 0                        | Left     | 11.2       | 5.5              | 70.9             | 10.3             | 1.4          | 0.7                 |
| 9   | MIAT     | Direct    | 60                       | Left     | 30.5       | 6.7              | 55.8             | 5.3              | 0.6          | 1.2                 |
| 10  | MIAT     | Center    | 0                        | Left     | 39.8       | 8.5              | 28.1             | 20.3             | 1.7          | 1.6                 |
| 11  | MIAT     | Center    | 15                       | Right    | 1.4        | 8.7              | 53.6             | 17.9             | 1.0          | 17.4                |
| 12  | MIAT     | Direct    | 0                        | Left     | 18.2       | 9.4              | 61.0             | 9.4              | 1.7          | 0.3                 |
| 13  | Trivair  | Direct    | 0                        | Left     | 31.0       | 10.9             | 44.5             | 11.9             | 1.3          | 0.4                 |
| 14  | MIAT     | Direct    | 15                       | Left     | 9.8        | 11.0             | 50.6             | 16.9             | 7.3          | 4.4                 |
| 15  | UDS      | Center    | 60                       | Right    | 0.6        | 12.4             | 59.0             | 15.5             | 11.2         | 1.3                 |
| 16  | UDS      | Center    | 60                       | Left     | 9.0        | 14.5             | 69.7             | 2.4              | 3.9          | 0.6                 |
| 17  | Trivair  | Direct    | 0                        | Right    | 8.9        | 14.5             | 60.8             | 14.8             | 0.7          | 0.3                 |
| 18  | UDS      | Direct    | 0                        | Left     | 6.9        | 14.8             | 73.0             | 4.9              | 0.3          | 0.1                 |
| 19  | UDS      | Center    | 0                        | Left     | 7.2        | 17.2             | 65.5             | 9.1              | 0.7          | 0.2                 |
| 20  | MIAT     | Center    | 60                       | Right    | 6.1        | 19.1             | 28.3             | 17.1             | 19.2         | 10.1                |
| 21  | MIAT     | Direct    | 15                       | Right    | 4.0        | 21.6             | 45.9             | 0.9              | 14.0         | 13.5                |
| 22  | UDS      | Direct    | 60                       | Left     | 15.7       | 22.0             | 59.1             | 1.6              | 1.4          | 0.2                 |
| 23  | UDS      | Center    | 0                        | Right    | 2.7        | 24.2             | 60.8             | 10.0             | 1.9          | 0.5                 |
| 24  | MIAT     | Direct    | 0                        | Right    | 14.6       | 25.5             | 30.2             | 6.6              | 18.3         | 4.8                 |
| 25  | UDS      | Direct    | 15                       | Left     | 8.0        | 29.0             | 56.1             | 5.0              | 1.1          | 0.9                 |
| 26  | MIAT     | Center    | 0                        | Right    | 1.9        | 31.2             | 47.1             | 12.3             | 6.5          | 0.9                 |
| 27  | UDS      | Direct    | 60                       | Right    | 2.2        | 37.6             | 54.3             | 1.1              | 3.8          | 1.0                 |
| 28  | UDS      | Center    | 15                       | Right    | 4.0        | 46.5             | 43.1             | 1.9              | 3.1          | 1.4                 |
| 29  | UDS      | Direct    | 15                       | Right    | 1.8        | 47.7             | 41.4             | 2.9              | 4.2          | 1.9                 |
| 30  | UDS      | Direct    | 0                        | Right    | 2.1        | 54.0             | 36.3             | 5.1              | 2.0          | 0.6                 |



| C6  | Factor 1 | Factor 2  | Factor 3                 | Factor 4 | Response 1 | Response 2       | Response 3       | Response 4       | Response 5   | Response 6          |
|-----|----------|-----------|--------------------------|----------|------------|------------------|------------------|------------------|--------------|---------------------|
| Run | Device   | Angle (°) | Inspiratory flow (L/min) | Side     | Nostril    | Olfactory region | Middle turbinate | Lower turbinates | Naso-pharynx | Post-nasal fraction |
|     |          |           |                          |          | %          | %                | %                | %                | %            | %                   |
| 1   | MIAT     | Center    | 60                       | Left     | 15.1       | 9.9              | 16.2             | 4.2              | 20.9         | 33.7                |
| 2   | MIAT     | Direct    | 60                       | Right    | 38.8       | 10.9             | 22.1             | 21.2             | 6.0          | 1.1                 |
| 3   | Trivair  | Center    | 0                        | Left     | 27.2       | 12.3             | 18.8             | 24.2             | 8.8          | 8.8                 |
| 4   | MIAT     | Center    | 15                       | Left     | 38.0       | 12.3             | 19.6             | 12.3             | 9.0          | 8.7                 |
| 5   | MIAT     | Center    | 15                       | Right    | 25.2       | 20.7             | 26.0             | 11.9             | 12.4         | 3.8                 |
| 6   | MIAT     | Center    | 60                       | Right    | 28.4       | 21.0             | 18.0             | 13.7             | 11.1         | 7.7                 |
| 7   | MIAT     | Center    | 0                        | Right    | 21.5       | 22.9             | 27.9             | 17.3             | 6.7          | 3.7                 |
| 8   | MIAT     | Direct    | 0                        | Right    | 25.4       | 27.3             | 23.4             | 13.0             | 8.2          | 2.7                 |
| 9   | Trivair  | Direct    | 0                        | Right    | 13.4       | 28.6             | 27.9             | 15.7             | 13.0         | 1.4                 |
| 10  | MIAT     | Direct    | 0                        | Right    | 23.8       | 31.8             | 30.5             | 6.1              | 7.2          | 0.6                 |
| 11  | Trivair  | Direct    | 0                        | Right    | 14.9       | 32.3             | 26.8             | 15.3             | 9.6          | 1.1                 |
| 12  | UDS      | Direct    | 60                       | Left     | 11.4       | 35.0             | 19.9             | 7.6              | 15.3         | 10.8                |
| 13  | UDS      | Center    | 0                        | Right    | 17.8       | 36.8             | 26.1             | 18.8             | 0.5          | 0.0                 |
| 14  | UDS      | Direct    | 60                       | Left     | 14.7       | 49.9             | 20.4             | 5.7              | 6.5          | 2.8                 |
| 15  | UDS      | Direct    | 15                       | Right    | 10.5       | 56.3             | 21.8             | 4.1              | 5.5          | 1.8                 |
| 16  | UDS      | Direct    | 15                       | Right    | 15.1       | 59.1             | 14.6             | 5.4              | 4.6          | 1.3                 |

| C7  | Factor 1 | Factor 2  | Factor 3                 | Factor 4 | Response 1 | Response 2       | Response 3       | Response 4       | Response 5   | Response 6          |
|-----|----------|-----------|--------------------------|----------|------------|------------------|------------------|------------------|--------------|---------------------|
| Run | Device   | Angle (°) | Inspiratory flow (L/min) | Side     | Nostril    | Olfactory region | Middle turbinate | Lower turbinates | Naso-pharynx | Post-nasal fraction |
|     |          |           |                          |          | %          | %                | %                | %                | %            | %                   |
| 1   | UDS      | Center    | 60                       | Right    | 13.2       | 3.3              | 60.0             | 2.1              | 19.2         | 2.0                 |
| 2   | TriVair  | Center    | 0                        | Left     | 45.5       | 1.0              | 42.2             | 5.5              | 4.3          | 1.5                 |
| 3   | TriVair  | Center    | 0                        | Right    | 28.7       | 0.9              | 53.4             | 7.5              | 7.9          | 1.7                 |
| 4   | MIAT     | Center    | 60                       | Left     | 49.9       | 7.3              | 30.7             | 1.5              | 6.7          | 3.8                 |
| 5   | UDS      | Center    | 0                        | Right    | 23.2       | 8.0              | 57.2             | 6.3              | 4.7          | 0.5                 |
| 6   | TriVair  | Direct    | 0                        | Left     | 46.8       | 5.1              | 42.0             | 2.3              | 2.2          | 1.6                 |
| 7   | MIAT     | Direct    | 0                        | Right    | 49.8       | 2.2              | 33.2             | 10.1             | 3.4          | 1.3                 |
| 8   | MIAT     | Direct    | 0                        | Left     | 52.8       | 1.5              | 26.9             | 5.0              | 11.7         | 2.1                 |
| 9   | UDS      | Direct    | 15                       | Left     | 45.7       | 1.2              | 45.7             | 5.2              | 1.5          | 0.8                 |
| 10  | MIAT     | Direct    | 60                       | Right    | 79.4       | 0.2              | 4.4              | 12.4             | 2.3          | 1.2                 |
| 11  | UDS      | Center    | 60                       | Left     | 53.4       | 0.6              | 39.4             | 2.7              | 3.5          | 0.4                 |
| 12  | UDS      | Center    | 15                       | Left     | 28.1       | 8.1              | 55.1             | 1.2              | 5.7          | 1.8                 |
| 13  | TriVair  | Direct    | 0                        | Right    | 30.8       | 4.8              | 47.6             | 9.2              | 6.0          | 2.1                 |
| 14  | UDS      | Direct    | 15                       | Right    | 31.9       | 0.3              | 51.9             | 2.1              | 12.1         | 1.7                 |
| 15  | UDS      | Direct    | 0                        | Left     | 31.2       | 5.9              | 56.9             | 3.9              | 2.0          | 0.2                 |
| 16  | MIAT     | Direct    | 15                       | Left     | 68.6       | 2.0              | 23.7             | 1.0              | 2.1          | 2.7                 |
| 17  | MIAT     | Center    | 60                       | Right    | 35.8       | 6.8              | 41.9             | 4.6              | 6.2          | 4.7                 |
| 18  | UDS      | Direct    | 60                       | Left     | 39.0       | 5.9              | 46.8             | 1.1              | 5.9          | 1.3                 |
| 19  | UDS      | Direct    | 60                       | Right    | 29.3       | 5.2              | 47.6             | 9.6              | 7.3          | 1.1                 |
| 20  | MIAT     | Direct    | 60                       | Left     | 29.9       | 2.9              | 42.8             | 2.8              | 13.8         | 7.9                 |
| 21  | MIAT     | Center    | 0                        | Left     | 44.8       | 7.0              | 40.9             | 3.6              | 2.9          | 0.7                 |
| 22  | MIAT     | Center    | 0                        | Right    | 33.2       | 11.0             | 42.2             | 9.5              | 3.9          | 0.3                 |
| 23  | UDS      | Center    | 0                        | Left     | 27.1       | 12.3             | 57.9             | 1.2              | 1.3          | 0.2                 |
| 24  | TriVair  | Direct    | 0                        | Left     | 53.4       | 6.1              | 37.4             | 0.8              | 2.3          | 0.0                 |

| C8  | Factor 1 | Factor 2  | Factor 3                 | Factor 4 | Response 1 | Response 2       | Response 3       | Response 4       | Response 5   | Response 6          |
|-----|----------|-----------|--------------------------|----------|------------|------------------|------------------|------------------|--------------|---------------------|
| Run | Device   | Angle (°) | Inspiratory flow (L/min) | Side     | Nostril    | Olfactory region | Middle turbinate | Lower turbinates | Naso-pharynx | Post-nasal fraction |
|     |          |           |                          |          | %          | %                | %                | %                | %            | %                   |
| 1   | Trivair  | Center    | 0                        | Right    | 24.1       | 3.5              | 37.5             | 30.7             | 3.8          | 0.3                 |
| 2   | Trivair  | Direct    | 0                        | Left     | 34.8       | 12.6             | 16.3             | 34.5             | 1.5          | 0.3                 |
| 3   | UDS      | Direct    | 60                       | Left     | 33.2       | 34.8             | 15.4             | 13.8             | 1.6          | 1.2                 |
| 4   | UDS      | Center    | 0                        | Right    | 21.5       | 23.4             | 31.7             | 13.1             | 0.5          | 0.1                 |
| 5   | MIAT     | Direct    | 15                       | Right    | 29.8       | 6.0              | 36.7             | 23.2             | 1.7          | 2.7                 |
| 6   | UDS      | Direct    | 60                       | Left     | 24.5       | 18.8             | 22.2             | 21.5             | 1.9          | 1.7                 |
| 7   | MIAT     | Direct    | 15                       | Right    | 29.5       | 2.9              | 36.7             | 24.7             | 3.5          | 2.8                 |
| 8   | MIAT     | Center    | 0                        | Left     | 21.1       | 5.2              | 26.9             | 43.4             | 2.9          | 0.4                 |
| 9   | MIAT     | Center    | 0                        | Left     | 12.9       | 4.2              | 37.3             | 44.4             | 0.7          | 0.4                 |
| 10  | Trivair  | Direct    | 0                        | Left     | 34.9       | 17.7             | 17.6             | 26.3             | 1.9          | 1.6                 |
| 11  | Trivair  | Center    | 0                        | Right    | 26.8       | 5.4              | 32.0             | 26.7             | 8.5          | 0.7                 |
| 12  | UDS      | Center    | 15                       | Left     | 14.0       | 10.7             | 18.9             | 37.1             | 0.6          | 1.9                 |
| 13  | UDS      | Direct    | 15                       | Left     | 25.6       | 14.2             | 22.6             | 28.5             | 0.6          | 1.6                 |
| 14  | MIAT     | Direct    | 0                        | Left     | 37.0       | 0.3              | 1.7              | 51.3             | 9.4          | 0.3                 |
| 15  | MIAT     | Direct    | 60                       | Left     | 34.1       | 13.0             | 19.5             | 30.3             | 1.1          | 1.9                 |
| 16  | MIAT     | Center    | 60                       | Left     | 35.1       | 1.2              | 9.4              | 47.5             | 4.8          | 2.0                 |
| 17  | UDS      | Direct    | 0                        | Right    | 20.9       | 5.4              | 60.1             | 12.9             | 0.5          | 0.1                 |
| 18  | UDS      | Direct    | 60                       | Left     | 33.8       | 23.7             | 20.5             | 21.2             | 0.4          | 0.4                 |

| C9  | Factor 1 | Factor 2  | Factor 3                 | Factor 4 | Response 1 | Response 2       | Response 3       | Response 4       | Response 5   | Response 6          |
|-----|----------|-----------|--------------------------|----------|------------|------------------|------------------|------------------|--------------|---------------------|
| Run | Device   | Angle (°) | Inspiratory flow (L/min) | Side     | Nostril    | Olfactory region | Middle turbinate | Lower turbinates | Naso-pharynx | Post-nasal fraction |
|     |          |           |                          |          | %          | %                | %                | %                | %            | %                   |
| 1   | UDS      | Direct    | 0                        | Right    | 53.5       | 0.9              | 24.9             | 20.5             | 0.1          | 0.0                 |
| 2   | MIAT     | Center    | 0                        | Right    | 57.3       | 1.8              | 21.8             | 18.8             | 0.2          | 0.1                 |
| 3   | Trivair  | Center    | 0                        | Right    | 18.6       | 2.9              | 48.0             | 30.0             | 0.3          | 0.2                 |
| 4   | UDS      | Center    | 15                       | Right    | 28.3       | 3.8              | 42.8             | 24.3             | 0.5          | 0.3                 |
| 5   | Trivair  | Center    | 0                        | Right    | 17.0       | 3.8              | 43.1             | 35.7             | 0.4          | 0.0                 |
| 6   | MIAT     | Direct    | 15                       | Right    | 20.3       | 4.0              | 55.2             | 19.0             | 1.3          | 0.1                 |
| 7   | UDS      | Center    | 60                       | Right    | 25.0       | 6.8              | 50.4             | 16.2             | 1.1          | 0.5                 |
| 8   | Trivair  | Direct    | 0                        | Left     | 31.1       | 6.9              | 51.8             | 9.5              | 0.6          | 0.0                 |
| 9   | UDS      | Direct    | 0                        | Right    | 35.9       | 7.2              | 36.2             | 20.6             | 0.1          | 0.0                 |
| 10  | Trivair  | Center    | 0                        | Right    | 11.1       | 7.4              | 61.0             | 20.1             | 0.3          | 0.1                 |
| 11  | Trivair  | Direct    | 0                        | Right    | 22.3       | 13.0             | 55.2             | 9.2              | 0.2          | 0.2                 |
| 12  | Trivair  | Center    | 0                        | Left     | 12.6       | 15.6             | 63.9             | 7.1              | 0.4          | 0.4                 |
| 13  | MIAT     | Center    | 15                       | Left     | 37.6       | 18.6             | 40.6             | 2.6              | 0.3          | 0.2                 |
| 14  | Trivair  | Direct    | 0                        | Left     | 20.0       | 24.0             | 50.4             | 4.9              | 0.1          | 0.5                 |
| 15  | UDS      | Direct    | 15                       | Left     | 19.2       | 36.1             | 40.8             | 3.5              | 0.1          | 0.3                 |
| 16  | UDS      | Center    | 0                        | Left     | 23.2       | 42.8             | 31.3             | 2.4              | 0.2          | 0.1                 |

| C10 | Factor 1 | Factor 2  | Factor 3                 | Factor 4 | Response 1 | Response 2       | Response 3       | Response 4       | Response 5   | Response 6          |
|-----|----------|-----------|--------------------------|----------|------------|------------------|------------------|------------------|--------------|---------------------|
| Run | Device   | Angle (°) | Inspiratory flow (L/min) | Side     | Nostril    | Olfactory region | Middle turbinate | Lower turbinates | Naso-pharynx | Post-nasal fraction |
|     |          |           |                          |          | %          | %                | %                | %                | %            | %                   |
| 1   | TriVair  | Center    | 0                        | Left     | 24.3       | 2.7              | 54.1             | 16.0             | 1.7          | 1.1                 |
| 2   | TriVair  | Center    | 0                        | Right    | 52.5       | 0.6              | 33.4             | 12.6             | 0.7          | 0.2                 |
| 3   | UDS      | Center    | 15                       | Right    | 24.2       | 4.1              | 57.3             | 10.8             | 2.1          | 1.6                 |
| 4   | TriVair  | Direct    | 0                        | Left     | 51.7       | 0.5              | 32.2             | 14.7             | 0.6          | 0.3                 |
| 5   | TriVair  | Center    | 0                        | Left     | 20.9       | 4.7              | 62.2             | 10.8             | 0.7          | 0.8                 |
| 6   | TriVair  | Direct    | 0                        | Right    | 25.6       | 0.3              | 33.8             | 37.3             | 1.9          | 1.2                 |
| 7   | UDS      | Direct    | 0                        | Right    | 28.3       | 3.2              | 53.3             | 13.6             | 1.3          | 0.3                 |
| 8   | MIAT     | Center    | 60                       | Left     | 24.7       | 0.7              | 53.2             | 19.0             | 1.4          | 1.0                 |
| 9   | UDS      | Direct    | 0                        | Left     | 25.7       | 4.0              | 55.8             | 13.1             | 1.2          | 0.2                 |
| 10  | MIAT     | Direct    | 15                       | Right    | 37.6       | 1.2              | 22.9             | 36.1             | 1.4          | 0.9                 |
| 11  | TriVair  | Direct    | 0                        | Left     | 54.8       | 1.0              | 26.2             | 16.3             | 0.9          | 0.8                 |
| 12  | UDS      | Direct    | 60                       | Left     | 25.5       | 8.3              | 51.8             | 10.7             | 2.2          | 1.4                 |
| 13  | MIAT     | Center    | 60                       | Right    | 20.9       | 12.5             | 34.6             | 21.1             | 6.0          | 4.9                 |
| 14  | MIAT     | Center    | 0                        | Left     | 31.1       | 0.2              | 24.4             | 39.6             | 3.7          | 1.0                 |

| C11 | Factor 1 | Factor 2  | Factor 3                 | Factor 4 | Response 1 | Response 2       | Response 3       | Response 4       | Response 5   | Response 6          |
|-----|----------|-----------|--------------------------|----------|------------|------------------|------------------|------------------|--------------|---------------------|
| Run | Device   | Angle (°) | Inspiratory flow (L/min) | Side     | Nostril    | Olfactory region | Middle turbinate | Lower turbinates | Naso-pharynx | Post-nasal fraction |
|     |          |           |                          |          | %          | %                | %                | %                | %            | %                   |
| 1   | MIAT     | Direct    | 0                        | Left     | 77.5       | 0.0              | 3.1              | 19.4             | 0.0          | 0.0                 |
| 2   | UDS      | Direct    | 60                       | Right    | 17.2       | 0.2              | 48.3             | 26.2             | 7.6          | 0.5                 |
| 3   | UDS      | Center    | 0                        | Right    | 34.9       | 0.4              | 6.6              | 57.2             | 0.8          | 0.2                 |
| 4   | UDS      | Center    | 60                       | Right    | 11.5       | 0.8              | 58.3             | 14.1             | 13.4         | 2.0                 |
| 5   | UDS      | Center    | 60                       | Right    | 11.0       | 1.0              | 56.4             | 11.6             | 17.8         | 2.2                 |
| 6   | UDS      | Center    | 60                       | Left     | 6.4        | 1.1              | 71.5             | 5.7              | 13.9         | 1.4                 |
| 7   | UDS      | Direct    | 15                       | Left     | 19.7       | 1.1              | 54.6             | 12.0             | 11.6         | 1.0                 |
| 8   | Trivair  | Center    | 0                        | Right    | 9.2        | 1.2              | 79.4             | 10.2             | 0.1          | 0.0                 |
| 9   | Trivair  | Direct    | 0                        | Right    | 11.7       | 1.2              | 59.5             | 27.3             | 0.1          | 0.2                 |
| 10  | MIAT     | Center    | 60                       | Right    | 18.6       | 2.7              | 61.6             | 10.9             | 5.6          | 0.6                 |
| 11  | MIAT     | Direct    | 15                       | Left     | 14.5       | 3.2              | 46.9             | 35.1             | 0.1          | 0.2                 |
| 12  | MIAT     | Direct    | 15                       | Right    | 23.5       | 4.8              | 62.1             | 6.7              | 1.4          | 1.6                 |
| 13  | Trivair  | Center    | 0                        | Left     | 21.8       | 6.1              | 52.6             | 16.8             | 1.7          | 1.0                 |
| 14  | Trivair  | Direct    | 0                        | Left     | 12.4       | 10.8             | 58.8             | 15.6             | 3.1          | 0.2                 |
| 15  | Trivair  | Direct    | 0                        | Left     | 13.8       | 14.7             | 65.3             | 5.7              | 0.3          | 0.1                 |
